# Supplementary material for: Whole-Genome Sequencing of Lactobacillus helveticus D75 and D76 Confirms Safety and Probiotic Potential
Source: PubMed Central journal article supplement (PMC7142726; doi:10.3390/microorganisms8030329), 2020-02-26
Supplement: microorganisms-08-00329-s001.pdf [file microorganisms-08-00329-s001.pdf]

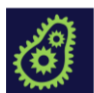

**Table S1.** Genes of *L. helveticus* D75 and D76 that are encoding proteins, involved in biosynthesis of exopolysaccharide components.

| Gene        | Position in the genome of <i>L. helveticus</i> D75 | Position in the genome of <i>L. helveticus</i> D76 | Gene translation product                                                                                                                                                                                     |
|-------------|----------------------------------------------------|----------------------------------------------------|--------------------------------------------------------------------------------------------------------------------------------------------------------------------------------------------------------------|
| <i>dltB</i> | 52716..53954                                       | 1485896..1487134                                   | D-alanyl transfer protein involved in the incorporation of D-alanine into lipoteichoic acids                                                                                                                 |
| <i>dltD</i> | 54245..55531                                       | 1487425..1488711                                   | membrane protein involved in the biosynthesis of D-alanyl-lipoteichoic acid                                                                                                                                  |
| <i>lysA</i> | 60027..60964                                       | 1493207..1494144                                   | glycoside hydrolase family 25 with lysozyme activity, involved in peptidoglycan catabolic process                                                                                                            |
| <i>eps</i>  | 61238..62854                                       | 1494418..1496034                                   | polysaccharide transporter                                                                                                                                                                                   |
| <i>hyd</i>  | 98080..98562                                       | 1532643..1533125                                   | hydrolase associated with cell wall catabolism and containing the N1pC / P60 protein domain. This protein carries out the hydrolysis of peptidoglycan during bacterial growth, development and cell division |
| <i>wzx</i>  | 299076..300539                                     | 1733641..1735104                                   | Flipase transporter, involved in synthesis of exopolysaccharides by polymerization and export                                                                                                                |
| <i>tagA</i> | 418185..418913                                     | 1852750..1853478                                   | glycosyltransferase of the WecB / TagA / CpsF family. The TagA protein family is involved into biosynthesis of cell wall polyglycerol phosphate                                                              |
| <i>epsE</i> | 418921..420021                                     | 1853486..1854586                                   | glycosyltransferase with glycosyltransferase family 4 and glycosyltransferase group 1 domains. This protein involved in exopolysaccharides biosynthesis pathway                                              |
| <i>tagF</i> | 426790..427944                                     | 1861355..1862509                                   | CDP-glycerol: polyglycerophosphotransferase. This protein participates in the biosynthesis of teichoic acid                                                                                                  |
| <i>epsU</i> | 427949..429379                                     | 1862514..1863944                                   | capsular biosynthesis protein                                                                                                                                                                                |
| <i>gtrA</i> | 540636..541175                                     | 1975201..1975740                                   | dolichyl-phosphate beta-D-mannosyltransferase is an intergar membrane protein, involved into biosynthesis of polysaccharides                                                                                 |
| <i>murE</i> | 686618..687970                                     | 64244..65596                                       | UDP-N-acetylmuramoylalanyl-D-glutamate-2,6-diamino-pimelate ligase. This protein involved into the second step of peptidoglycan biosynthesis                                                                 |
| <i>gtrA</i> | 744428..744844                                     | 122054..122470                                     | dolichyl-phosphate beta-D-mannosyltransferase, an intergar membrane protein involved into biosynthesis of polysaccharides                                                                                    |
| <i>pbp</i>  | 760107..761921                                     | 137733..139880 547                                 | penicillin-binding protein. This protein involved into the final step of peptidoglycan biosynthesis and encoded by pseudogene                                                                                |
| <i>murG</i> | 764620..765726                                     | 142246..143352                                     | UDP-N-acetylglucosamine--N-acetylmuramyl-(pentapeptide) pyrophosphoryl-undecaprenol N-                                                                                                                       |

|              |                  |                |                                                                                                                                                                                |
|--------------|------------------|----------------|--------------------------------------------------------------------------------------------------------------------------------------------------------------------------------|
|              |                  |                | acetylglucosamine transferase. This peptide involved into the peptidoglycan biosynthesis pathway                                                                               |
| <i>pbp</i>   | 980532..981629   | 358127..359224 | penicillin-binding protein. Involved into the final step of peptidoglycan biosynthesis.                                                                                        |
| <i>ykuD</i>  | 983163..984368   | 360758..361963 | transpeptidase with peptidoglycan binding domain. This protein gives rise to an alternative pathway for peptidoglycan cross-linking                                            |
| <i>pbp1A</i> | 1158878..1161178 | 536232..538532 | Membrane penicillin-binding carboxypeptidase 1A. This protein involved into the final step of peptidoglycan biosynthesis.                                                      |
| <i>lys</i>   | 1329788..1331023 | 708522..709757 | protein with lysozyme activity and surface later protein A domain. This protein involved into peptidoglycan catabolic process                                                  |
| <i>pbp2B</i> | 1450192..1452300 | 828926..831034 | membrane penicillin-binding carboxypeptidase 2B with transpeptidase domain. This protein involved into the final step of peptidoglycan biosynthesis.                           |
| <i>ykuD</i>  | 1576492..1577166 | 956606..957280 | transpeptidase with YkuD domain. It has been shown that domain YkuD can act as an L,D-transpeptidase that gives rise to an alternative pathway for peptidoglycan cross-linking |
| <i>dacA</i>  | 1578143..1579438 | 958257..959552 | D-alanyl-D-alanine carboxypeptidase. This protein involved into the peptidoglycan biosynthesis and degradation process                                                         |

**Table S2.** Genes of *L. helveticus* D75 and D76 that are encoding surface adhesive proteins.

| Gene          | Position in the genome of <i>L. helveticus</i> D75 | Position in the genome of <i>L. helveticus</i> D76 | Gene translation product                             |
|---------------|----------------------------------------------------|----------------------------------------------------|------------------------------------------------------|
| <i>mucBP</i>  | 383312..383779                                     | 1817877..1818344                                   | mucin binding protein, encoding by hypothetical gene |
| <i>mucBP</i>  | 873784..874104                                     | 251411..251731                                     | mucin binding protein                                |
| <i>mucBP</i>  | 874101..874787                                     | 251728..252414                                     | mucin binding protein                                |
| <i>mucBP</i>  | 874774..875076                                     | 252401..252703                                     | mucin binding protein, encoding by hypothetical gene |
| <i>mucBP</i>  | 875124..875291                                     | 252751..252918                                     | mucin binding protein                                |
| <i>fbpA</i>   | 1144883..1146577                                   | 522237..523931                                     | fibronectin                                          |
| <i>slpA</i>   | 1219708..1220208                                   | 597062..597562                                     | S-layer protein                                      |
| <i>srtA</i>   | 1226873..1227562                                   | 604227..604916                                     | class A sortase                                      |
| <i>mucBP</i>  | 1584744..1585364                                   | 964858..965478                                     | mucin binding protein, encoding by hypothetical gene |
| <i>slpA</i>   | 1823168..1823740                                   | 1203282..1203854                                   | S-layer protein                                      |
| <i>fbpIII</i> | 1847693..1849087                                   | 1227807..1229201                                   | protein with fibronectin type III domain             |
| <i>slpA</i>   | 1866469..1867833                                   | 1246583..1247947                                   | S-layer protein                                      |
| <i>slpA</i>   | 1989578..1990480                                   | 1369692..1370594                                   | S-layer protein                                      |

**Table S3.** Genes of *L. helveticus* D75 and D76 that are encoding proteins, involved in casein utilization.

| Gene          | Position in the genome of <i>L. helveticus</i> D75 | Position in the genome of <i>L. helveticus</i> D76 | Gene translation product                                                                                |
|---------------|----------------------------------------------------|----------------------------------------------------|---------------------------------------------------------------------------------------------------------|
| <i>pepN</i>   | 208194..210728                                     | 1642757..1645291                                   | intracellular peptidase                                                                                 |
| <i>dtpT</i>   | 210838..211719                                     | 1645401..1646267                                   | proton-dependent oligopeptide transporter                                                               |
| <i>pepD4</i>  | 217882..219294                                     | 1652447..1653859                                   | D4 family dipeptidase                                                                                   |
| <i>yvpB</i>   | 264253..264966                                     | 1698818..1699531                                   | cysteine protease                                                                                       |
| <i>pepA</i>   | 478203..479285                                     | 1912768..1913850                                   | A family intracellular peptidase                                                                        |
| <i>pepM24</i> | 541758..542585                                     | 1976323..1977150                                   | M24 family cobalt-dependent methionine aminopeptidase                                                   |
| <i>pepM16</i> | 590270..591484                                     | 2026215..2027429                                   | M16 family peptidase                                                                                    |
| <i>clpP</i>   | 622701..623285                                     | 327..911                                           | ATP-dependent protease                                                                                  |
| <i>pepCE</i>  | 882452..883765                                     | 260079..261392                                     | CE family cysteine peptidase                                                                            |
| <i>pepT2</i>  | 985911..987197                                     | 363506..364792                                     | T2 family intracellular tripeptidase                                                                    |
| <i>pepM20</i> | 1050472..1051737                                   | 428066..429331                                     | M20 family peptidase                                                                                    |
| <i>prtH</i>   | 1059720..1065005                                   | 437314..440053                                     | extracellular proteinase lactocepin H (in <i>L. helveticus</i> D76 encoded by pseudoene)                |
| <i>pepO2</i>  | 1066263..1068209                                   | 443550..445496                                     | O2 family endopeptidase                                                                                 |
| <i>pepV</i>   | 1088319..1089722                                   | 465606..467009                                     | intracellular dipeptidase                                                                               |
| <i>pepT1</i>  | 1190204..1191445                                   | 567558..568799                                     | T1 family intracellular tripeptidase                                                                    |
| <i>pepM23</i> | 1205766..1206221                                   | 583120..583575                                     | M23 family peptidase                                                                                    |
| <i>pepO</i>   | 1257415..1259358                                   | 634769..636712                                     | O family endopeptidase                                                                                  |
| <i>pepD2</i>  | 1278053..1279474                                   | 656787..658208                                     | D2 family dipeptidase                                                                                   |
| <i>oppA</i>   | 1285191..1286711                                   | 663925..665445                                     | periplasmic oligopeptide-binding protein with transmembrane transporter activity                        |
| <i>oppA</i>   | 1287156..1288907                                   | 665890..667641                                     | periplasmic oligopeptide-binding protein with transmembrane transporter activity                        |
| <i>oppC</i>   | 1289113..1290042                                   | 667847..668776                                     | periplasmic oligopeptide transport protein                                                              |
| <i>oppB</i>   | 1290057..1291016                                   | 668791..669750                                     | periplasmic oligopeptide transport protein                                                              |
| <i>oppF</i>   | 1291019..1292005                                   | 669753..670739                                     | ATP-binding oligopeptide ABC transporter                                                                |
| <i>oppD</i>   | 1292009..1293043                                   | 670743..671777                                     | ATP-binding oligopeptide ABC transporter                                                                |
| <i>pepQ2</i>  | 1319996..1321105                                   | 698730..699839                                     | Q2 family Pro-Xaa proline peptidase                                                                     |
| <i>pepX</i>   | 1333459..1335840                                   | 712193..714574                                     | intracellular x-prolyl-dipeptidyl peptidase                                                             |
| <i>pepQ</i>   | 1382902..1383483                                   | 761636..762217                                     | intracellular peptidase                                                                                 |
| <i>pepQ</i>   | 1383486..1384103                                   | 762220..762837                                     | intracellular peptidase                                                                                 |
| <i>oppA3</i>  | 1384117..1385724                                   | 762851..764458                                     | periplasmic oligopeptide-binding protein with transmembrane transporter activity, encoded by pseudogene |
| <i>pepM1</i>  | 1508274..1509788                                   | 887008..888522                                     | M1 family membrane alanine peptidase                                                                    |
| <i>prtH3</i>  | 1516632..1521602                                   | 895366..900336                                     | extracellular proteinase lactocepin H3                                                                  |
| <i>prtP</i>   | 1588098..1589006                                   | 968212..969120                                     | putative cell wall associated proteinase                                                                |
| <i>pepQ</i>   | 1632307..1633413                                   | 1012421..1013527                                   | Pro-Xaa peptidase                                                                                       |
| <i>pepC</i>   | 1716220..1717569                                   | 1096333..1097682                                   | C family peptidase                                                                                      |
| <i>pepD</i>   | 1808406..1809830                                   | 1188520..1189944                                   | D family dipeptidase                                                                                    |
| <i>pepG</i>   | 1843780..1845093                                   | 1223894..1225207                                   | E2 family intracellular peptidase                                                                       |
| <i>pep</i>    | 1907056..1908292                                   | 1287170..1288406                                   | serine protease                                                                                         |
| <i>pepI</i>   | 1940701..1941585                                   | 1320815..1321699                                   | I family Pro-Xaa peptidase                                                                              |

**Table S4.** Genes of *L. helveticus* D75 and D76 that are encoding proteins, involved in utilization of milk sugars.

| Gene         | Position in the genome of <i>L. helveticus</i> D75 | Position in the genome of <i>L. helveticus</i> D76 | Gene translation product                  |
|--------------|----------------------------------------------------|----------------------------------------------------|-------------------------------------------|
| <i>glcU</i>  | 153033..153920                                     | 1587596..1588483                                   | glucose transporter                       |
| <i>lctP2</i> | 253742..254791                                     | 1688498..1689356                                   | L-lactate permease, encoded by pseudogene |
| <i>lacS</i>  | 1426981..1428897                                   | 805715..807631                                     | lactose permease                          |
| <i>lacR</i>  | 1433031..1434038                                   | 811765..812772                                     | transcriptional regulator                 |
| <i>lacL</i>  | 1435240..1437126                                   | 813974..815860                                     | large subunit of beta-galactosidase       |
| <i>lacM</i>  | 1437110..1438066                                   | 815844..816800                                     | small subunit of beta-galactosidase       |
| <i>ldh</i>   | 1779366..1780337                                   | 1159479..1160450                                   | lactate dehydrogenase                     |

**Table S5.** Genes of *L. helveticus* D75 and D76 that are encoding proteins, involved in Leloir metabolic pathway.

| Gene        | Position in the genome of <i>L. helveticus</i> D75 | Position in the genome of <i>L. helveticus</i> D76 | Gene translation product                |
|-------------|----------------------------------------------------|----------------------------------------------------|-----------------------------------------|
| <i>galM</i> | 1377923..1378918                                   | 756657..757652                                     | galactose mutarotase                    |
| <i>galT</i> | 1379039..1380502                                   | 757773..759236                                     | galactose-1-phosphate uridyltransferase |
| <i>galK</i> | 1380524..1381690                                   | 759258..760424                                     | galactokinase                           |
| <i>galE</i> | 1438171..1439163                                   | 816905..817897                                     | UDP-galactose 4-epimerase               |

**Table S6.** Genes of *L. helveticus* D75 and D76 that are encoding CRISPR-Cas system.

| Gene          | Position in the genome of <i>L. helveticus</i> D75 | Position in the genome of <i>L. helveticus</i> D76 | Gene translation product                                |
|---------------|----------------------------------------------------|----------------------------------------------------|---------------------------------------------------------|
| CRISPR1       | 1360958..1361168                                   | 739692..739902                                     | first CRISPR array                                      |
| CRISPR2       | 1490768..1491325                                   | 869502..870059                                     | second CRISPR array                                     |
| CRISPR3       | 1492138..1493550                                   | 870872..872284                                     | third CRISPR array                                      |
| <i>cas2</i>   | 1493735..1494016                                   | 872469..872750                                     | type I-B CRISPR-associated endonuclease Cas2            |
| <i>cas1</i>   | 1494022..1495011                                   | 872756..873745                                     | type I-B CRISPR-associated endonuclease Cas1            |
| <i>cas4</i>   | 1495021..1495512                                   | 873755..874246                                     | type I-B CRISPR-associated endonuclease Cas4            |
| <i>cas3</i>   | 1495528..1497957                                   | 874262..876691                                     | type I-B CRISPR-associated helicase / Cas3 endonuclease |
| <i>cas5</i>   | 1498100..1498813                                   | 876834..877547                                     | type I-B CRISPR-associated protein Cas5                 |
| <i>cas7</i>   | 1498800..1499702                                   | 877534..878436                                     | type I-B CRISPR-associated protein Cas7                 |
| <i>cas8b1</i> | 1499721..1501478                                   | 878455..880212                                     | type I-B CRISPR-associated protein Cas8b1               |
| <i>cas6</i>   | 1501496..1502251                                   | 880230..880985                                     | type I-B CRISPR-associated endonuclease Cas6            |

**Table S7.** Genes of *L. helveticus* D75 and D76 that are encoding proteins, involved into specific antibacterial antagonism.

| <b>Gene</b>  | <b>Position in the genome of <i>L. helveticus</i> D75</b> | <b>Position in the genome of <i>L. helveticus</i> D76</b> | <b>Gene translation product</b>                                                                                                                                                          |
|--------------|-----------------------------------------------------------|-----------------------------------------------------------|------------------------------------------------------------------------------------------------------------------------------------------------------------------------------------------|
| <i>slpA1</i> | 196015..197187                                            | 1630578..1631750                                          | surface layer protein, probably involved in bacteriocin biosynthesis                                                                                                                     |
| <i>helJ1</i> | 197306..198268                                            | 1631869..1632831                                          | class III bacteriocin helveticin J. Peptide toxin produced by bacteria to inhibit the growth of a similar or closely related bacterial strain                                            |
| <i>helJ2</i> | 198298..198612                                            | 1632861..1633175                                          | open reading frame of bacteriocin class III helveticin J                                                                                                                                 |
| <i>cvpA</i>  | 225735..226271                                            | 1660300..1660836                                          | CvpA family protein. This protein participates in the synthesis of colicin V bacteriocin ( <i>cvaC</i> gene)                                                                             |
| <i>entI</i>  | 241697..242020                                            | 1676262..1676585                                          | enterocin A immunity protein                                                                                                                                                             |
| <i>entI</i>  | 255040..255312                                            | 1689605..1689877                                          | enterocin A immunity protein, encoded by hypothetical gene                                                                                                                               |
| <i>helJ3</i> | 467742..468227                                            | 1902307..1902792                                          | class III bacteriocin helveticin J. Peptide toxin produced by bacteria to inhibit the growth of a similar or closely related bacterial strain. This protein encoded by hypothetical gene |
| <i>slpA2</i> | 468321..469397                                            | 1902886..1903962                                          | surface layer protein, probably involved in bacteriocin biosynthesis                                                                                                                     |
| <i>entI</i>  | 518263..518628                                            | 1952828..1953193                                          | enterocin A immunity protein                                                                                                                                                             |
| <i>slpA3</i> | 1509877..1510854                                          | 888611..889588                                            | surface layer protein, probably involved in bacteriocin biosynthesis                                                                                                                     |
| <i>helJ4</i> | 1507159..1508136                                          | 885893..886870                                            | class III bacteriocin helveticin J. Peptide toxin produced by bacteria to inhibit the growth of a similar or closely related bacterial strain.                                           |
| <i>slpA4</i> | 1789582..1790658                                          | 1169695..1170771                                          | surface layer protein, probably involved in bacteriocin biosynthesis                                                                                                                     |
| <i>helJ5</i> | 1790748..1791497                                          | 1170861..1171610                                          | class III bacteriocin helveticin J. Peptide toxin produced by bacteria to inhibit the growth of a similar or closely related bacterial strain.                                           |

**Table S8.** Genes of *L. helveticus* D75 and D76 that are encoding proteins, involved into antibiotics and xenobiotics tolerance.

| Gene        | Position in the genome of <i>L. helveticus</i> D75 | Position in the genome of <i>L. helveticus</i> D76 | Gene translation product                                                                                                |
|-------------|----------------------------------------------------|----------------------------------------------------|-------------------------------------------------------------------------------------------------------------------------|
| <i>vanZ</i> | 664276..664791                                     | 41902..42417                                       | membrane protein that confers a low level of resistance to the glycopeptide antibiotic teicoplanin                      |
| <i>vanZ</i> | 681652..682266                                     | 59278..59892                                       | membrane protein that confers a low level of resistance to the teicoplanin antibiotic                                   |
| <i>blaZ</i> | 685285..686298                                     | 62911..63924                                       | class C beta-lactamase protein that providing multi-resistance to $\beta$ -lactam antibiotics                           |
| <i>pbpX</i> | 818620..819702                                     | 196246..197328                                     | penicillin binding protein containing beta-lactamase domain                                                             |
| <i>mprF</i> | 1610666..1611692                                   | 990780..991806                                     | Phosphatidylglycerol lysyltransferase, encoded by pseudogene                                                            |
| <i>had</i>  | 1626502..1627281                                   | 1006616..1007395                                   | 4-nitrophenylphosphatase. This protein carries out biodegradation of aminobenzoate xenobiotics by acting on ester bonds |
| <i>terC</i> | 1922220..1923008                                   | 1302334..1303122                                   | tellurium resistance protein embedded in the bacterial cell membrane                                                    |
| <i>pbpX</i> | 1977115..1978125                                   | 1357229..1358239                                   | penicillin binding protein containing beta-lactamase domain                                                             |
